# Supplementary material for: Mitochondria-adaptor TRAK1 promotes kinesin-1 driven transport in crowded environments
Source: PubMed Central journal article supplement (PMC7305210; doi:10.1038/s41467-020-16972-5), 2020-06-19
Supplement: 41467_2020_16972_MOESM1_ESM.pdf [file 41467_2020_16972_MOESM1_ESM.pdf]

## **Supplementary Information**

### **Mitochondria-adaptor TRAK1 promotes kinesin-1 driven transport in crowded environments**

**Henrichs et al.**

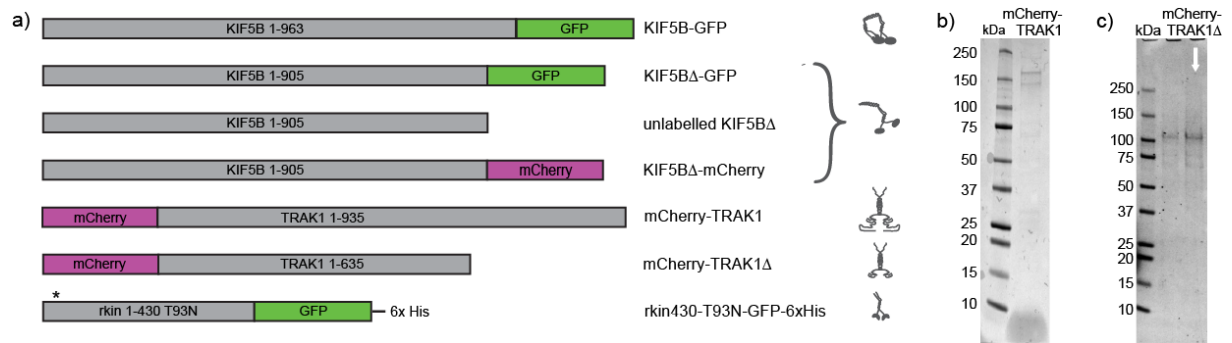

**Supplementary Figure 1. Related to Figure 1-5. a)** List of constructs used in this study. The asterisk indicates the position of the T93N point mutation of the rigor binding kinesin-1 mutant rkin430. **b)** SDS-gel of purified mCherry-TRAK1. **c)** SDS-gel of purified mCherry-TRAK1Δ. Source data are provided as a Source Data file.

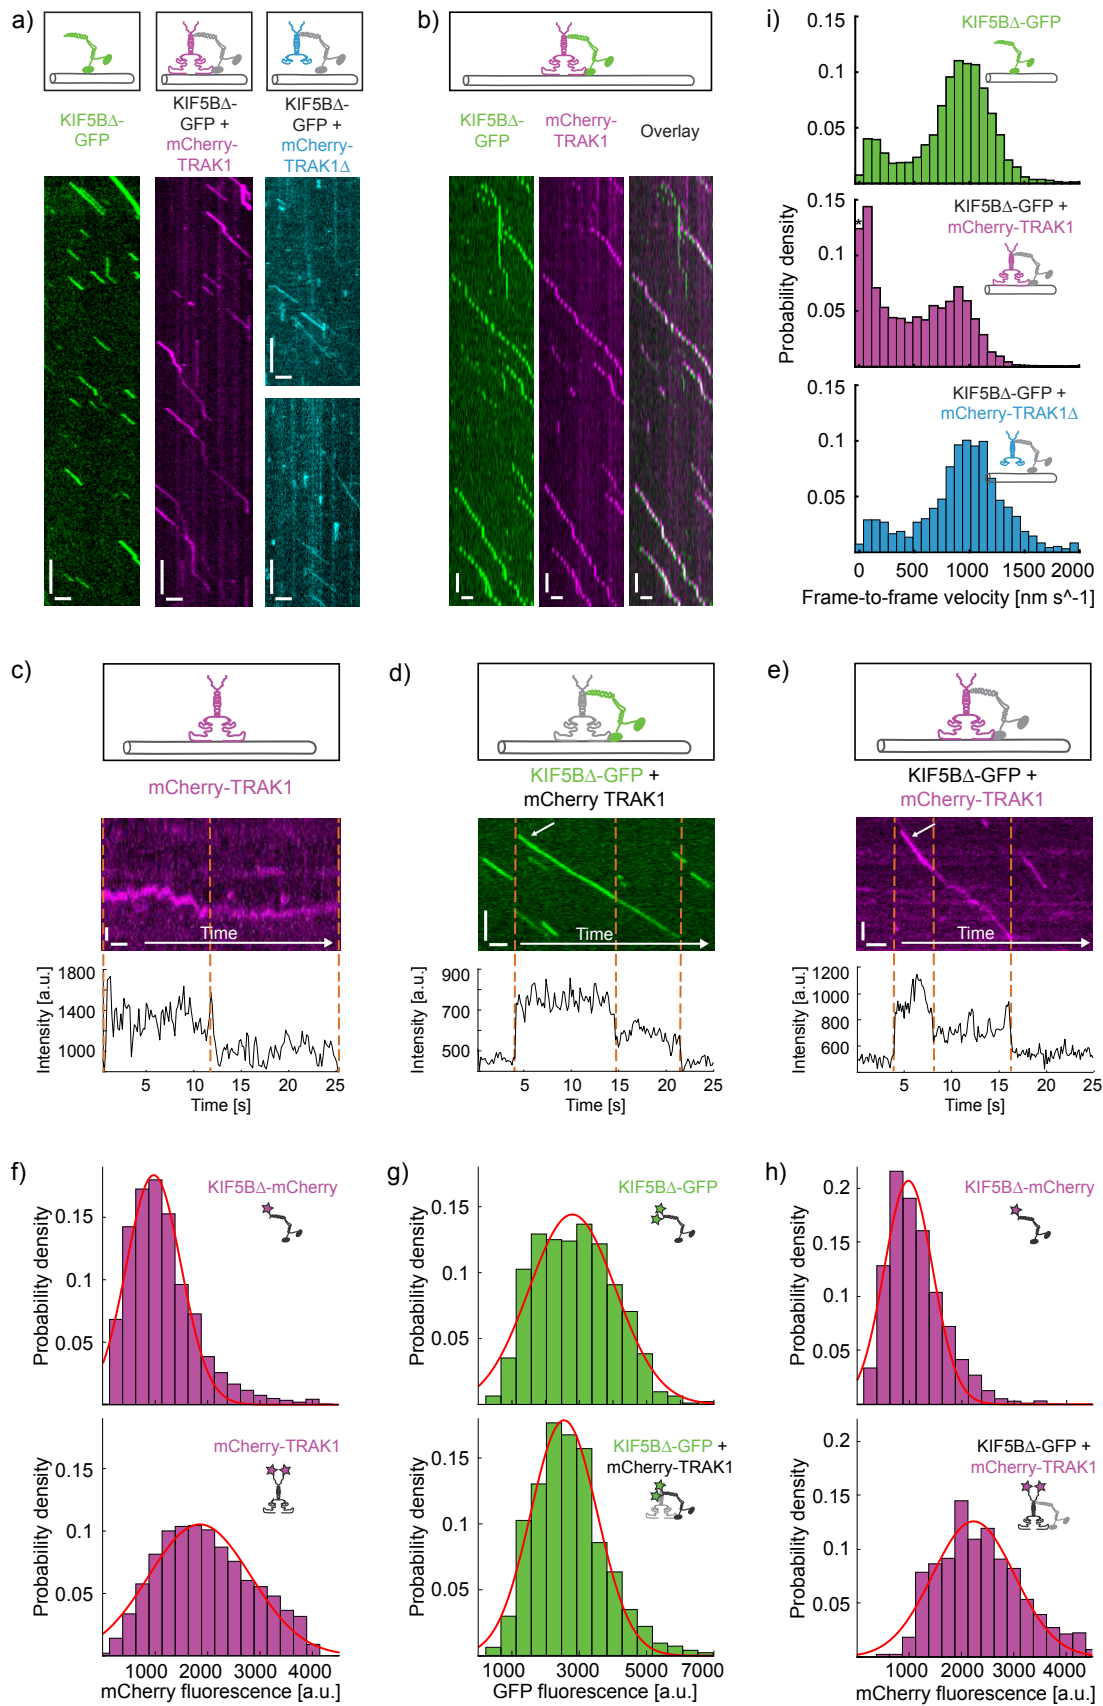

**Supplementary Figure 2. Related to Figure 2 and 5.** **a)** Schematic illustrations and kymographs of processively moving KIF5B $\Delta$ -GFP (green), mCherry-TRAK1 in presence of KIF5B $\Delta$ -GFP (magenta) and mCherry-TRAK1 $\Delta$  in presence of KIF5B $\Delta$ -

GFP (cyan). Horizontal scale bars 2  $\mu\text{m}$ , vertical 5 s. **b)** Schematic illustration and kymographs of KIF5B $\Delta$ -GFP colocalizing with mCherry-TRAK1 and walking processively along a microtubule. Horizontal scale bars 2  $\mu\text{m}$ , vertical 5 s. **c) - e)** Schematic illustrations, kymographs and intensity time traces (Methods) showing two-step photobleaching of the mCherry signal of mCherry-TRAK1 diffusing along a microtubule and of the GFP and mCherry signal, respectively, of KIF5B $\Delta$ -GFP-mCherry-TRAK1 complexes walking processively along a microtubule, suggesting the presence of both molecules in a dimeric form. The white arrows indicate the molecules yielding the respective time traces. The dashed lines indicate the photobleaching steps. Horizontal scale bars 2 s, vertical 1  $\mu\text{m}$ . **f)** Histograms of the background-subtracted integrated fluorescence intensities of the mCherry signal and Gaussian fits (red) of constitutively dimeric<sup>31,77</sup> KIF5B $\Delta$ -mCherry (top,  $n = 355$  molecules) and of mCherry-TRAK1 (bottom,  $n = 256$  molecules). Size exclusion chromatography measurements revealed that the large majority of KIF5B $\Delta$ -mCherry dimers harbor a single active mCherry fluorophore, while the large majority of mCherry-TRAK1 dimers harbor two active mCherry fluorophores (Methods, Supplementary Table 1). We thus interpret the single peak in the KIF5B $\Delta$ -mCherry intensity distribution as the signal of a single active mCherry fluorophore harbored by the (constitutively dimeric) KIF5B $\Delta$  and the single peak in the mCherry-TRAK1 distribution (centered at around twice the KIF5B $\Delta$ -mCherry intensity) as the signal of two active mCherry fluorophores harbored by a TRAK1 dimer. **g)** Histograms of the background-subtracted integrated fluorescence intensities of the GFP signal and Gaussian fits (red) of the constitutively dimeric KIF5B $\Delta$ -GFP (top,  $n = 79$  molecules) and KIF5B $\Delta$ -GFP in complex with mCherry-TRAK1 (bottom,  $n = 150$  molecules). The similar position of the peaks in both histograms indicates that a single KIF5B $\Delta$ -GFP dimer is present in a KIF5B $\Delta$ -GFP-mCherry-TRAK1 transport complex. **h)** Histograms of the background-subtracted integrated fluorescence intensities of the mCherry signal and Gaussian fits (red) of KIF5B $\Delta$ -mCherry (top,  $n = 33$  molecules) harboring a single mCherry fluorophore per dimer (Methods, Supplementary Table 1) and mCherry-TRAK1 harboring two mCherry fluorophores per dimer (Methods, Supplementary Table 1) in complex with KIF5B $\Delta$ -GFP (bottom,  $n = 150$  molecules). Analogously to f), the position of the peak in the histogram of mCherry-TRAK1 in complex with KIF5B $\Delta$ -GFP (centered at around twice the KIF5B $\Delta$ -mCherry intensity) indicates that a single TRAK1 dimer is present in a KIF5B $\Delta$ -GFP-mCherry-TRAK1 transport complex. **i) c)** Histograms of frame-to-frame

velocities of KIF5B $\Delta$ -GFP (green), KIF5B $\Delta$ -GFP in presence of mCherry-TRAK1 (magenta) and KIF5B $\Delta$ -GFP in presence of mCherry-TRAK1 $\Delta$  (cyan). The median frame-to-frame velocity of KIF5B $\Delta$ -GFP decreased in presence of mCherry-TRAK1 from 909 nm s<sup>-1</sup> (lower, upper quantile limit 687 nm s<sup>-1</sup>, 1085 nm s<sup>-1</sup>,  $n = 534$  molecules,  $N = 2$  experiments) to 458 nm s<sup>-1</sup> (lower, upper quantile limit 97 nm s<sup>-1</sup>, 842 nm s<sup>-1</sup>,  $n = 487$  molecules,  $N = 4$  experiments). The population around zero (indicated by an asterisk) represents a high number of transient pauses. In presence of mCherry-TRAK1 $\Delta$  the median frame-to-frame velocity of KIF5B $\Delta$ -GFP did not decrease (972 nm s<sup>-1</sup>, lower, upper interquartile limit 732 nm s<sup>-1</sup>, 1060 nm s<sup>-1</sup>,  $n = 82$  molecules,  $N = 2$  experiments). Experiments were repeated at least 10 times with similar results. Source data are provided as a Source Data file.

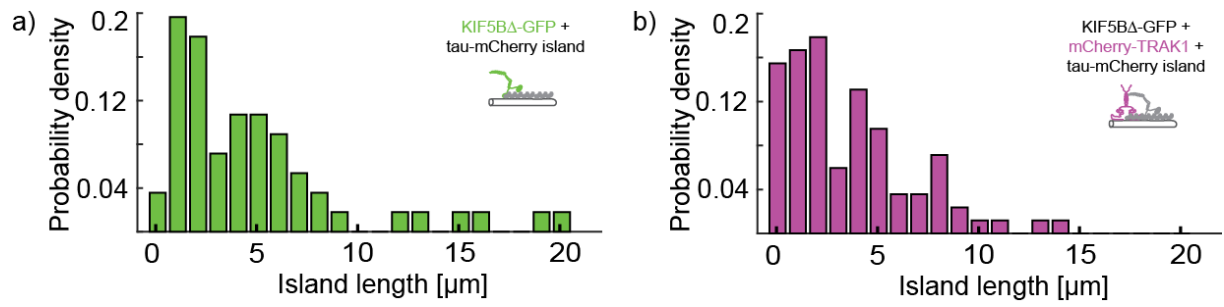

**Supplementary Figure 3. Related to Figure 3.** Histograms of the tau island length distribution in experiments with **a)** KIF5B $\Delta$ -GFP ( $4.75 \pm 4.8 \mu\text{m}$ , mean  $\pm$  standard deviation,  $n = 56$  islands,  $N = 4$  experiments) and **b)** KIF5B $\Delta$ -GFP-mCherry-TRAK1 complexes ( $3.54 \pm 3.12 \mu\text{m}$ , mean  $\pm$  standard deviation,  $n = 84$  islands,  $N = 4$  experiments). Source data are provided as a Source Data file.

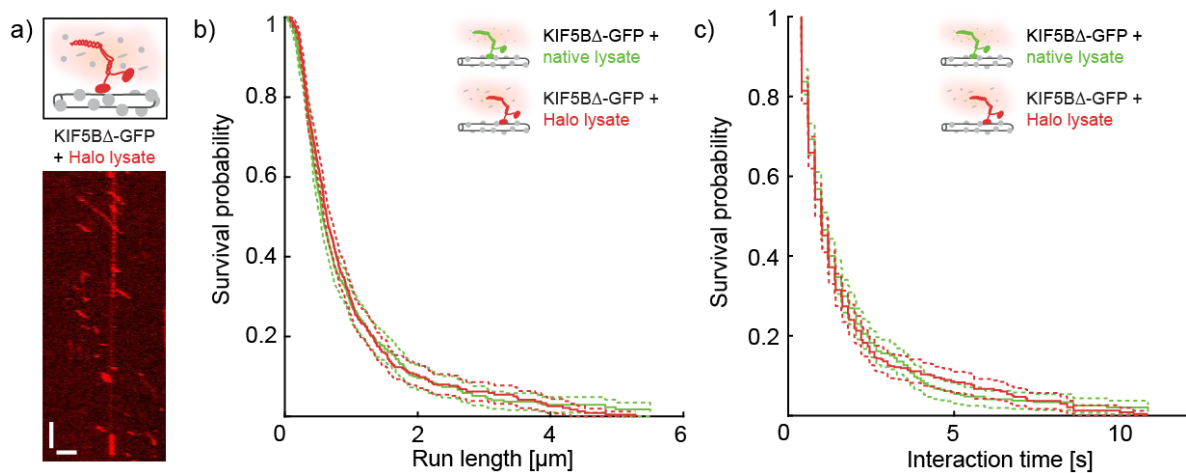

**Supplementary Figure 4. Related to Figure 4.** **a)** Schematic illustration and kymograph of processively moving KIF5B $\Delta$ -GFP in Halo lysate. Horizontal scale bar 1  $\mu\text{m}$ , vertical 10 s. **b), c)** Survival probabilities indicating a similar median run length (0.63  $\mu\text{m}$  ( $\text{CI}_{95}$  (0.58, 0.69)  $\mu\text{m}$ ,  $n = 555$  molecules,  $N = 6$  experiments)) and interaction time (1 s ( $\text{CI}_{95}$  (0.82, 1.02) s,  $n = 555$  molecules,  $N = 6$  experiments)) of KIF5B $\Delta$ -GFP in Halo lysate (red) in comparison to native lysate (green) (compare to Figure 4h,i) ( $p = 0.6$  and  $p = 0.3$ , respectively). Two-tailed  $p$ -values were obtained by a log-rank test. Source data are provided as a Source Data file.

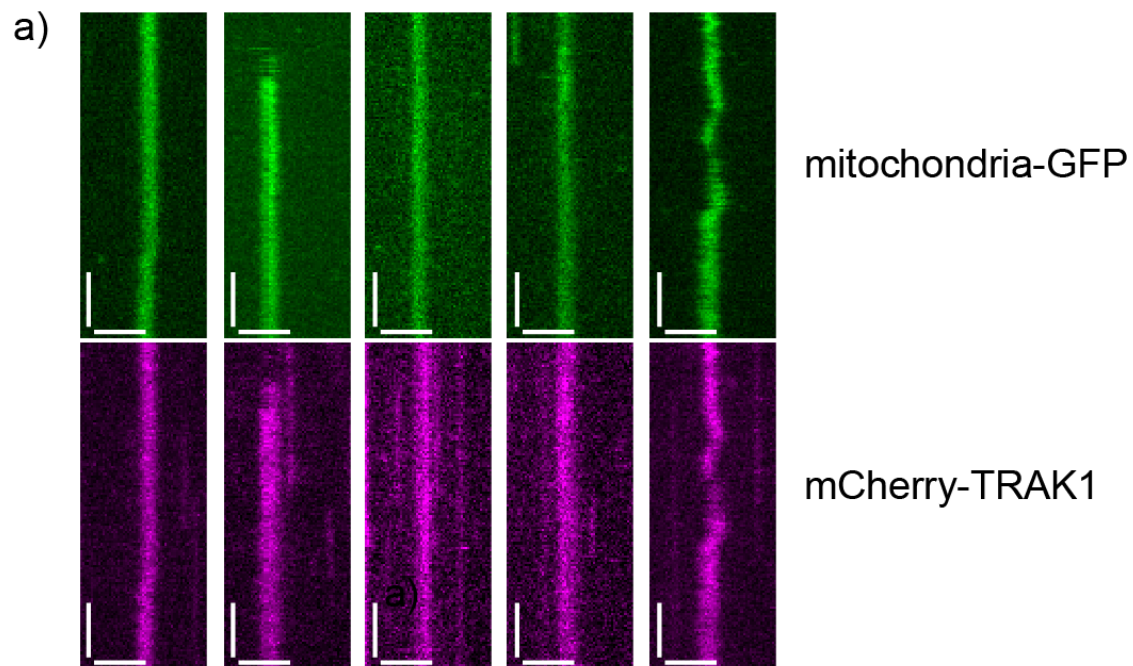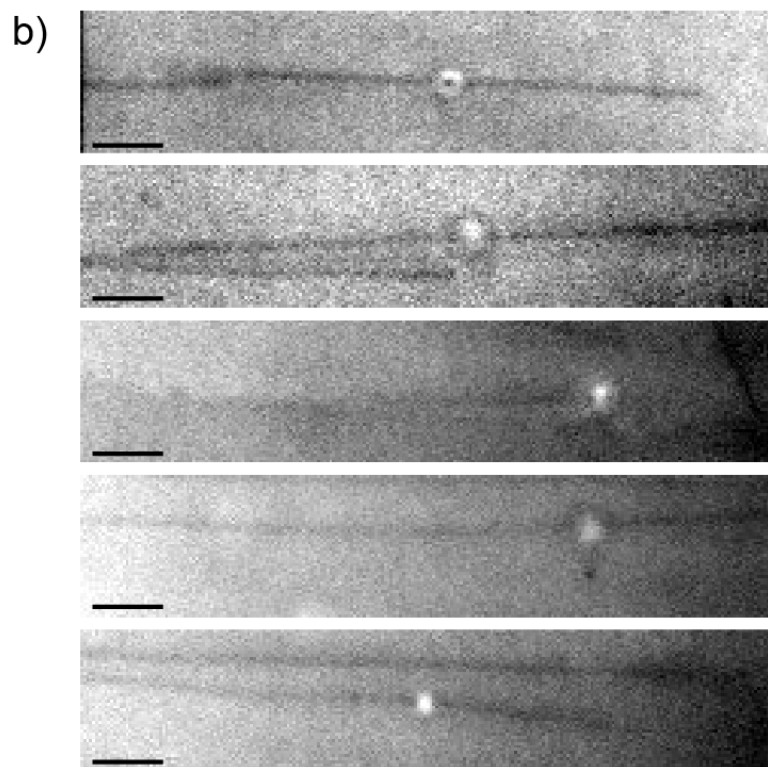

**Supplementary Figure 5. Related to Figure 5.** **a)** Kymographs showing stationary and diffusive tethering of mitochondria-GFP (green) to microtubules by mCherry-TRAK1 (magenta). The experiment was repeated 5 times independently with similar results). Horizontal scale bars 2  $\mu\text{m}$ , vertical 10 s. **b)** Representative interference reflection microscopy images of single mitochondria bound to microtubules. Scale bars 2  $\mu\text{m}$ .



**Supplementary Table 1: Values for calculating the labelling efficiencies of KIF5B $\Delta$ -mCherry and mCherry-TRAK1**

|                                                                                     | KIF5B $\Delta$ -GFP | mCherry-TRAK1 |
|-------------------------------------------------------------------------------------|---------------------|---------------|
| Absorbance at 280 nm [AU] ( $A_{280}$ )                                             | 35.96               | 44.00         |
| Absorbance at 561 nm [AU] ( $A_{561}$ )                                             | 6.85                | 33.95         |
| Extinction coeff. of protein at 280 nm [ $M^{-1} cm^{-1}$ ] ( $\mathcal{E}_{280}$ ) | 82500               | 82000         |
| Extinction coeff. of protein at 561 nm [ $M^{-1} cm^{-1}$ ] ( $\mathcal{E}_{561}$ ) | 72000               | 72000         |
| Labelling efficiency                                                                | 0.2183              | 0.8787        |

A is the absorbance and  $\mathcal{E}$  the extinction coefficient at 280 nm ( $A_{280}$  and  $\mathcal{E}_{280}$ ) and 561 nm ( $A_{561}$  and  $\mathcal{E}_{561}$ ), respectively.

**Supplementary Table 2: Primers used in this work.**

|                                         | <b>Forward primers</b>                                                            | <b>Reverse primer</b>                                                    | <b>PCR</b>     |
|-----------------------------------------|-----------------------------------------------------------------------------------|--------------------------------------------------------------------------|----------------|
| <b>mCherry-TRAK1</b>                    | TCGGAGAACCTGTA<br>CTTC<br>CAGTCTACCATGGT<br>GAGC<br>AAGGGCGAGGAGG<br>ATAAC<br>ATG | GGGGACCACTTTGT<br>ACAAGAA<br>AGCTGGGTTATTAC<br>CGTAAGCT<br>AGTTTGTGGAGAG | Gateway step 1 |
| <b>mCherry-TRAK1</b>                    | GGGGACAAGTTTGT<br>ACAA<br>AAAAGCAGGCTCGG<br>AGAA<br>CCTGTA<br>CTTCCAG             | GGGGACCACTTTGT<br>ACAAGAA<br>AGCTGGGTTATTAC<br>CGTAAGCT<br>AGTTTGTGGAGAG | Gateway step 2 |
| <b>mCherry-TRAK1<math>\Delta</math></b> | GACACAGGTGACCA<br>CTAA<br>ATTTCTCTCCCACGC                                         | GCGTGGGAGAGAA<br>ATTTAGTG<br>GTCACCTGTGTC                                | Mutagenesis    |
| <b>KIF5B</b>                            | AATAATAACATGCGG<br>CCG<br>CAATGGCGGACCTGG<br>CCG<br>AGTG                          | AATAATAACATGGCG<br>GCCCCA<br>CTTGTTTGCCTCCTCC<br>ACCTC                   | Amplification  |
| <b>KIF5B<math>\Delta</math></b>         | AATAATAACATGCGG<br>CCG<br>CAATGGCGGACCTGG<br>CCG<br>AGTG                          | AATAATAACATGGCG<br>GCCTG<br>CTTCCTTTATGCGAT<br>CTACTTC<br>TTGC           | Amplification  |
